# Supplementary material
Source: MDPI journal article supplement (https://www.mdpi.com/2308-3417/9/3/64)
Supplement: s1 [file s1]

**Table S1.** revised Cochrane Risk of bias 2 tool for randomized controlled trials (RoB 2 tool).

|                            | Bias arising from the randomization process | Bias due to deviations from intended interventions | Bias due to missing outcome data | Bias in the measurement of outcome | Bias in selection of the reported result | Overall bias |
|----------------------------|---------------------------------------------|----------------------------------------------------|----------------------------------|------------------------------------|------------------------------------------|--------------|
| Petracca; etal 1996        | high                                        | low                                                | unclear                          | low                                | low                                      | Unclear risk |
| Roth, et al ,1996[         | unclear                                     | unclear                                            | unclear                          | low                                | high                                     | Unclear risk |
| Petracca; etal 2001        | unclear                                     | unclear                                            | unclear                          | low                                | low                                      | Unclear risk |
| Lyketsos; et al 2003       | low                                         | low                                                | low                              | low                                | low                                      | low          |
| deVasconcelos et al,2007   | unclear                                     | unclear                                            | low                              | unclear                            | unclear                                  | Unclear risk |
| Rosenberg;etal, 2010       | high                                        | unclear                                            | unclear                          | unclear                            | high                                     | Unclear risk |
| Weintraub;et a;.2010       | high                                        | unclear                                            | high                             | unclear                            | unclear                                  | Unclear risk |
| Drye LT et al, 2011 DIAD-2 | unclear                                     | high                                               | unclear                          | high                               | unclear                                  | Unclear risk |
| Banerjee S; et al, 2011    | low                                         | low                                                | low                              | low                                | low                                      | low          |
| Banerjee S; et al, 2013    | low                                         | low                                                | low                              | low                                | low                                      | low          |
| Romeo R; et al.2013        | unclear                                     | low                                                | low                              | low                                | low                                      | low          |
| An H;etal ,2017[           | unclear                                     | unclear                                            | unclear                          | high                               | high                                     | Unclear risk |
| Zuidersma M;et al, 2019    | unclear                                     | low                                                | unclear                          | low                                | low                                      | low          |
| Takemoto et al., 2020      | unclear                                     | low                                                | unclear                          | low                                | low                                      | low          |
| Banerjee S;etal 2021       | low                                         | low                                                | low                              | low                                | low                                      | low          |
| Jeong HW;et al 2022        | unclear                                     | low                                                | unclear                          | low                                | low                                      | low          |
